# Supplementary material for: Photochromic Azobenzene Inverse Opal Film toward Dynamic Anti-Fake Pattern
Source: MDPI journal article supplement (doi:10.3390/molecules28155881), 2023-08-04
Supplement: s1 [file s1]

# Supporting Information

## Photochromic Azobenzene Inverse Opal Film toward Dynamic Anti-Fake Pattern

Junchao Liu <sup>2</sup>, Zhitong Han <sup>1</sup>, Pingping Wu <sup>3</sup>, Yuanyuan Shang <sup>4</sup>, Jiansheng Chen <sup>1</sup> and Pan Jia <sup>1,\*</sup>

<sup>1</sup> Hebei Key Laboratory of Inorganic Nanomaterials, College of Chemistry and Material Science,  
Hebei Normal University, Shijiazhuang 050024, China; hzt@stu.hebtu.edu.cn (Z.H.);  
cjs@stu.hebtu.edu.cn (J.C.)

<sup>2</sup> School of Sciences, Xi'an University of Technology, Xi'an 710048, China;  
liujunchao17@mailsucas.edu.cn

<sup>3</sup> School of Chemistry and Chemical Engineering, Xi'an University of Architecture and Technology,  
Xi'an 710055, China; pingpingwu@xauat.edu.cn

<sup>4</sup> Hubei Key Laboratory of Processing and Application of Catalytic Materials, College of Chemistry and Chemical Engineering, Huanggang Normal University, Huanggang 438000, China; shangyuanyuan19@mailsucas.ac.cn

\* Correspondence: jiafan@hebtu.edu.cn

### Table of Content:

1. Fabrication process of AZOIO.
2. The modulation effect of AZOIOs' bandgap and photo-isomerization on fluorescent property.

## 1. Fabrication process of AZOIO

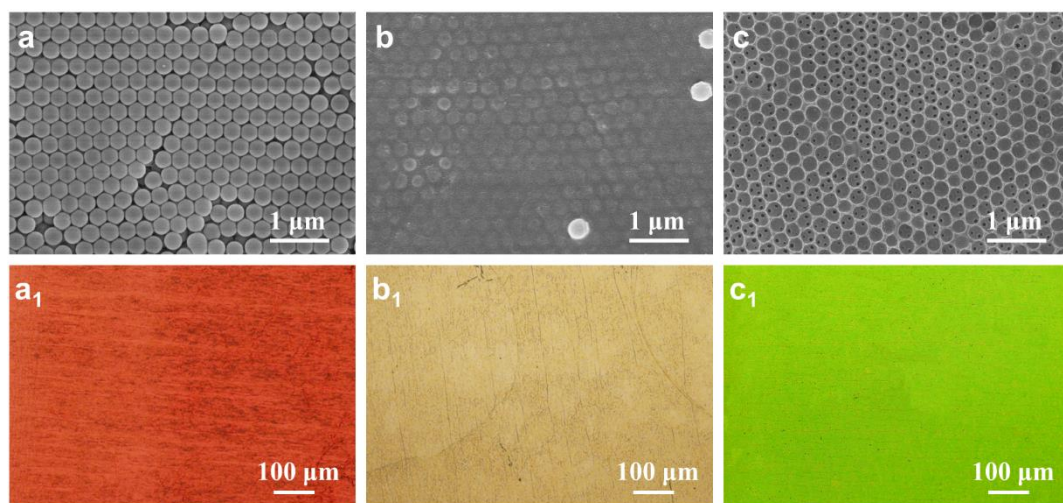

**Figure S1.** SEM and corresponding optical images of the fabrication process for AZOIOs. (a, a<sub>1</sub>) SiO<sub>2</sub> opal template, (b, b<sub>1</sub>) composite opal (the interstice of SiO<sub>2</sub> opal template was infiltrated by LC precursor), and (c, c<sub>1</sub>) AZOIOs.

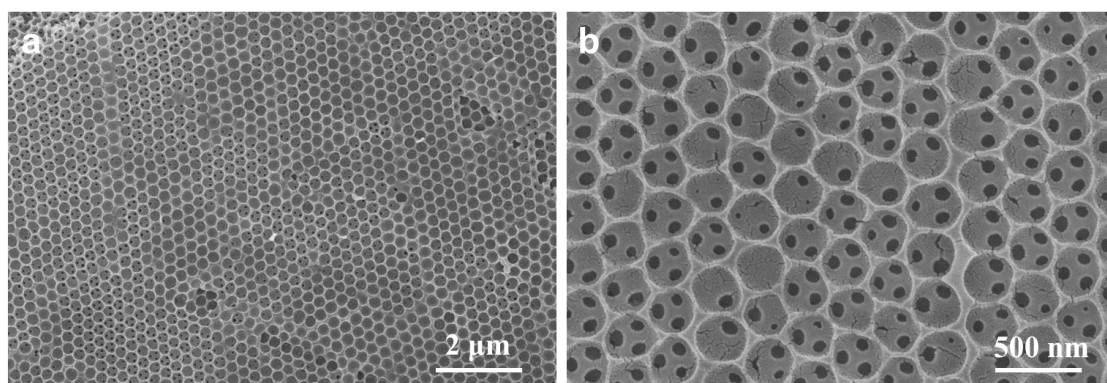

**Figure S2.** SEM images of the as-prepared AZOIOs.

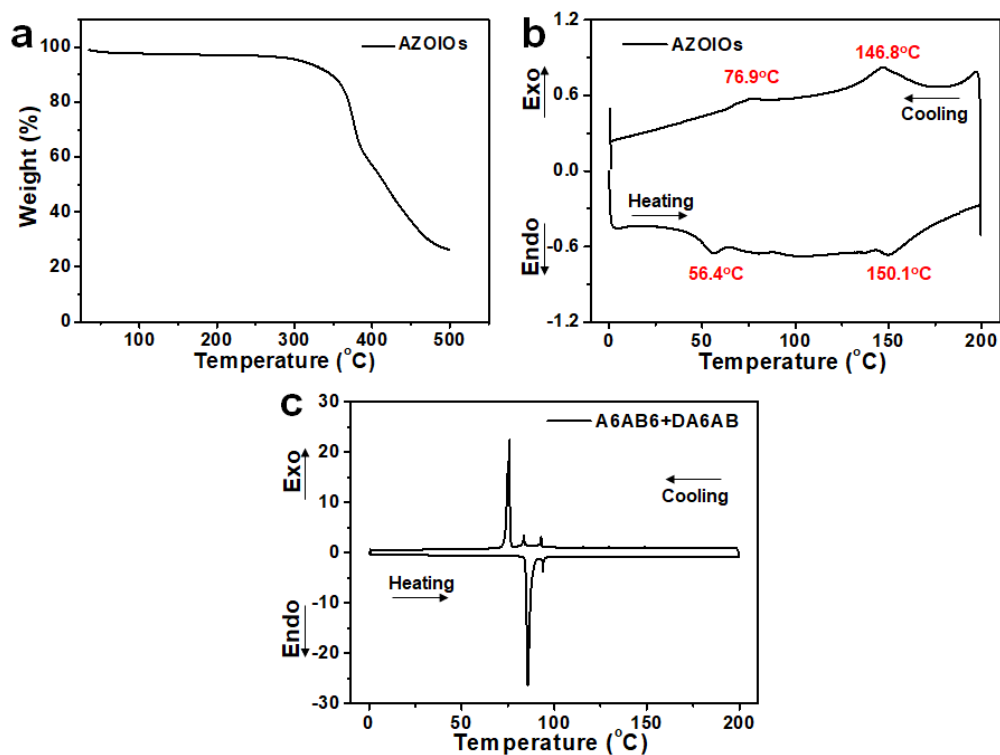

**Figure S3.** (a) TGA of AZOIOs. (b) DSC curves from the second scan ( $\pm 10$  °C/min) of AZOIOs. (c) DSC curves from the second scan ( $\pm 10$  °C/min) of the monomeric mixture.

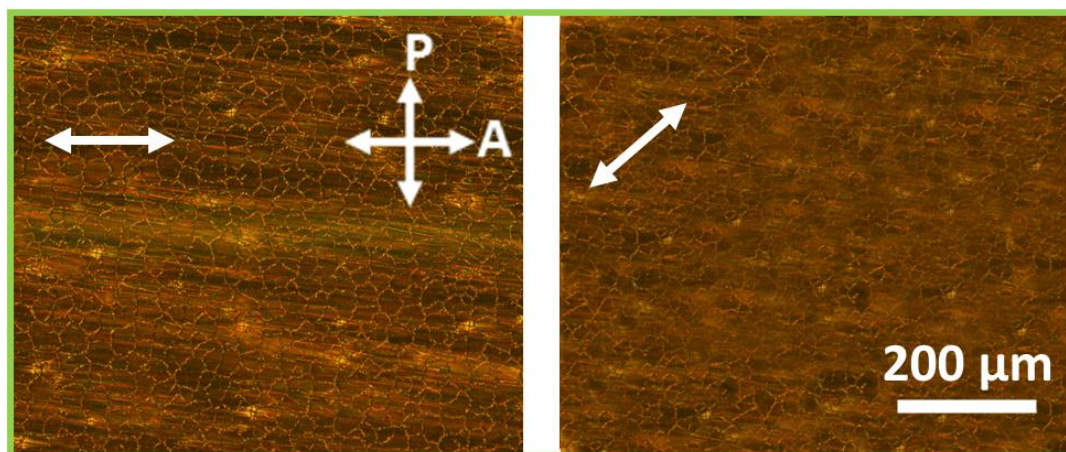

**Figure S4.** POM images of AZOIOs. P: polarizer, A: analyzer.

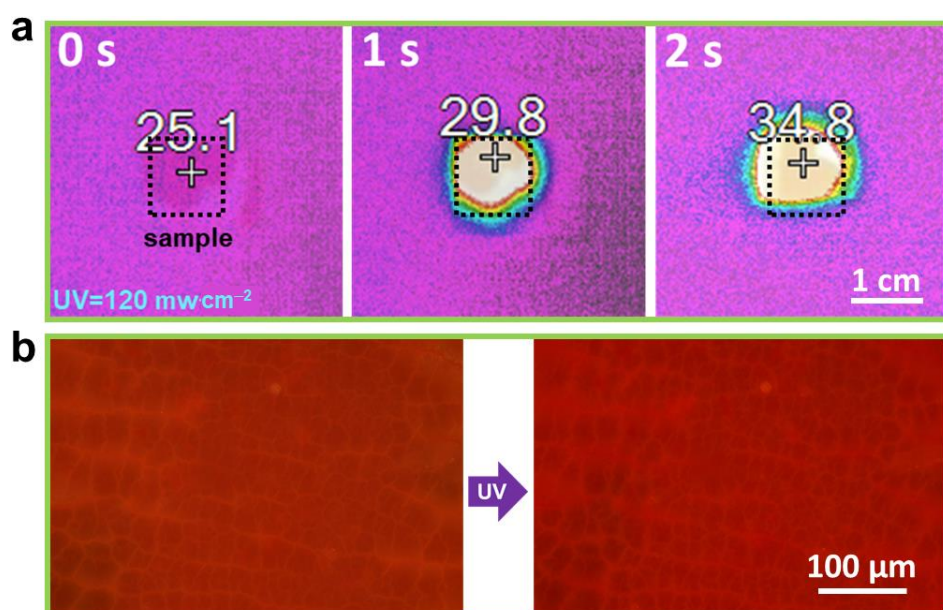

**Figure S5.** (a) The temperature change of AZOIOs under UV irradiation (120 mW/cm<sup>2</sup>, 2 s). (b) POM images of AZOIOs before and after UV irradiation (120 mW/cm<sup>2</sup>, 2 s).

## 2. The modulation effect of AZOIOs' bandgap and photo-isomerization on fluorescent property

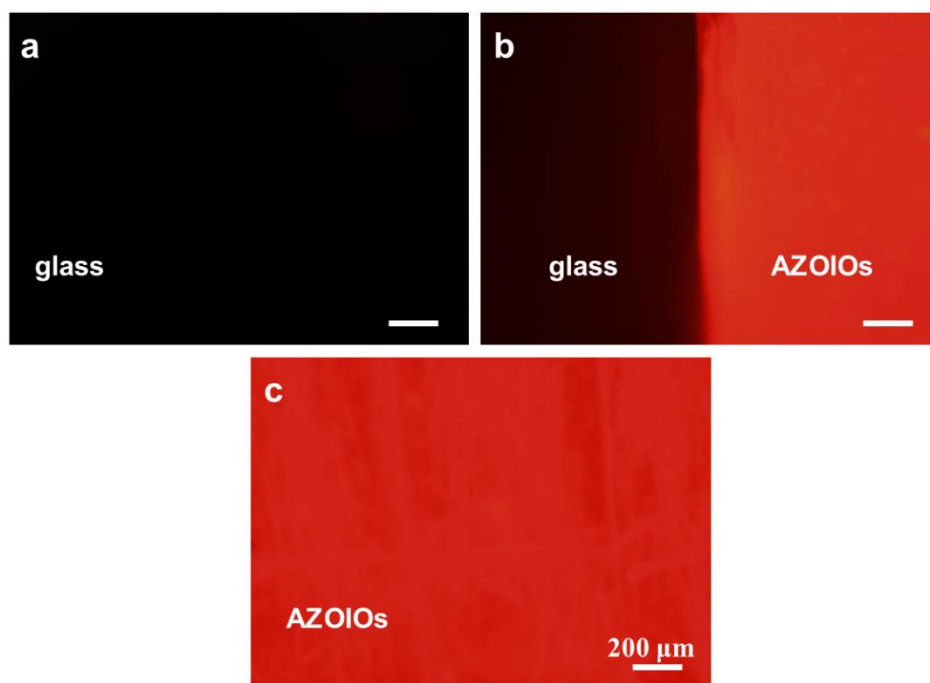

**Figure S6.** Fluorescent images of (a) glass, (b) the boundary of AZOIOs, and (c) AZOIOs.

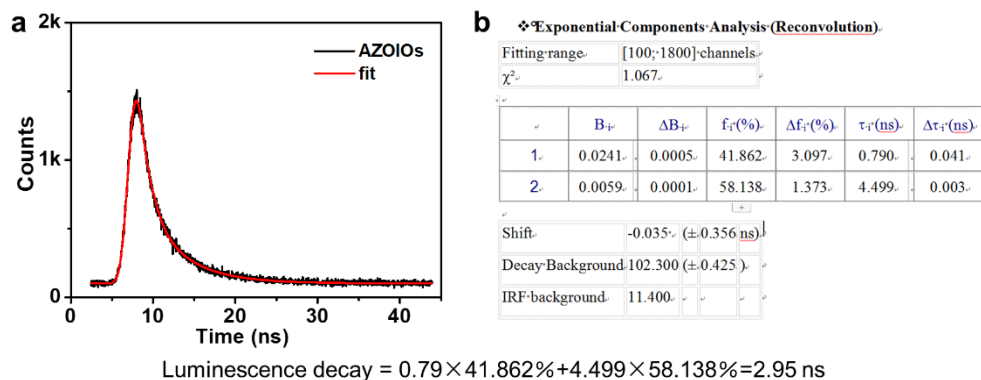

**Figure S7.** The luminescence decay of AZOIOs when excited at 560 nm.

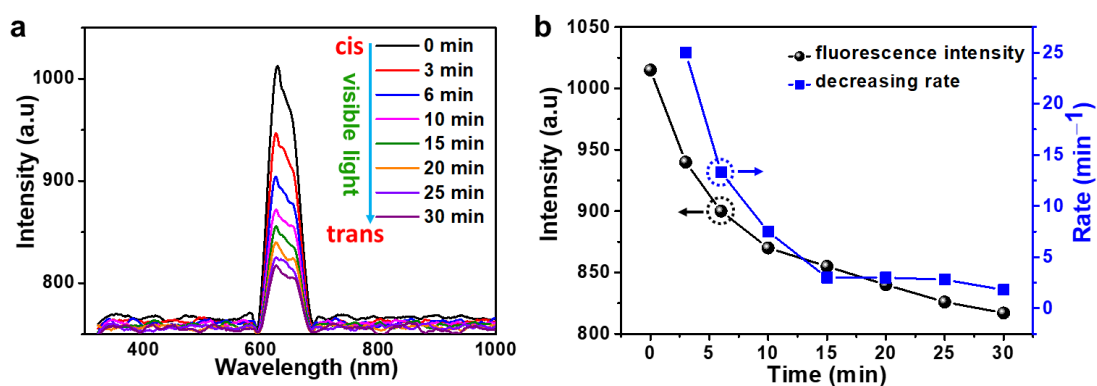

**Figure S8.** (a) The fluorescent intensity changes of the *cis*-bulk azobenzene polymer (a fresh bulk azobenzene polymer irradiated by 30 mW/cm<sup>2</sup> UV light for 1 min) under visible irradiation (10 mW/cm<sup>2</sup>) for different time. (b) The transformation of fluorescent intensity and fluorescent decreasing rate for *cis*-bulk azobenzene polymer as a function of visible irradiation time.



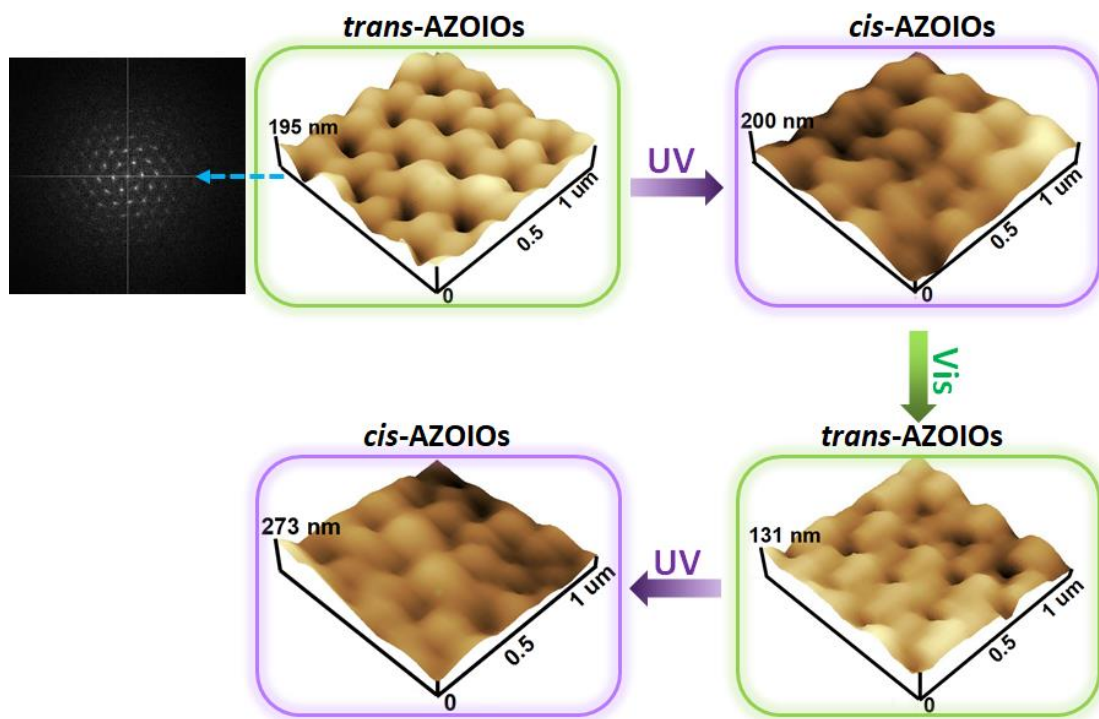

**Figure S9.** AFM images of the AZOIOs under alternating UV/vis irradiation and the corresponding Fourier transform.

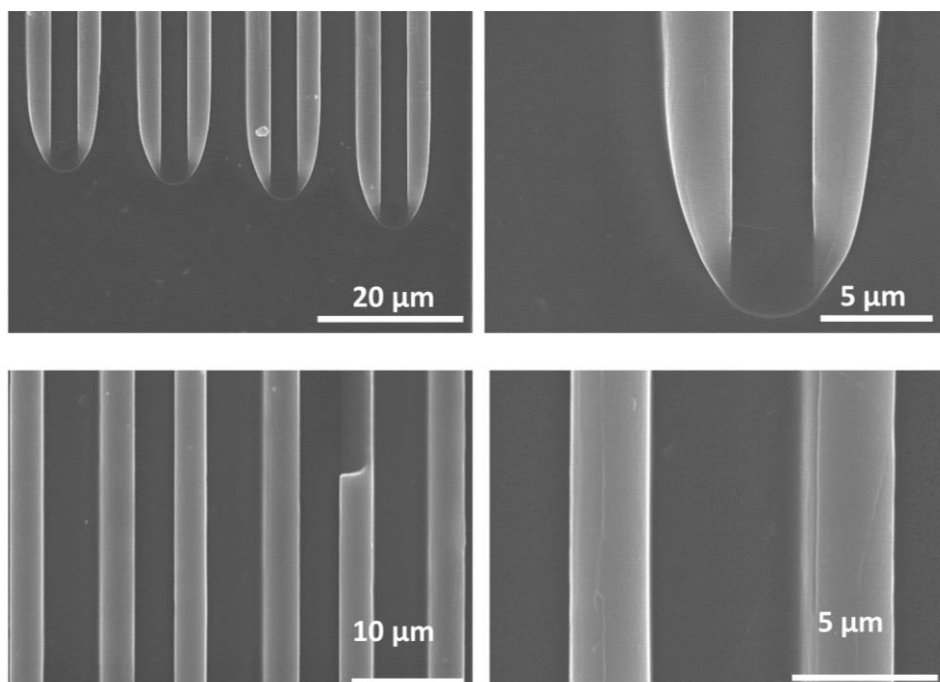

**Figure S10.** SEM images of the patterned bulk azobenzene polymer on a cover glass.

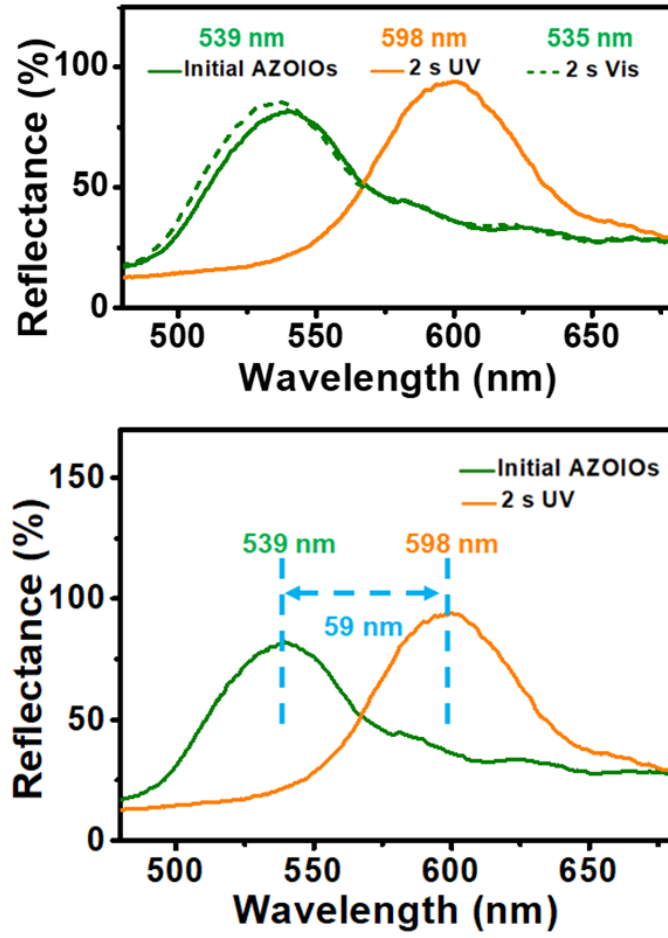

**Figure S11.** Reversible bandgap shift of AZOIOs under alternating UV (365 nm, 120 mW/cm<sup>2</sup>) and visible (560 nm, 120 mW/cm<sup>2</sup>) irradiation.

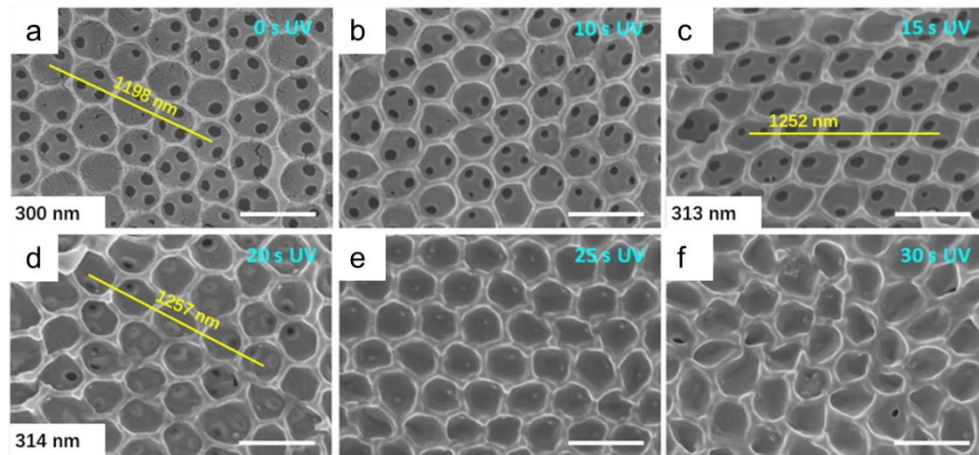

**Figure S12.** SEM images of the AZOIOs after UV irradiation (20 mW/cm<sup>2</sup>) with different time. (a) 0 s; (b) 10 s; (c) 15 s; (d) 20 s; (e) 25 s; (f) 30 s.

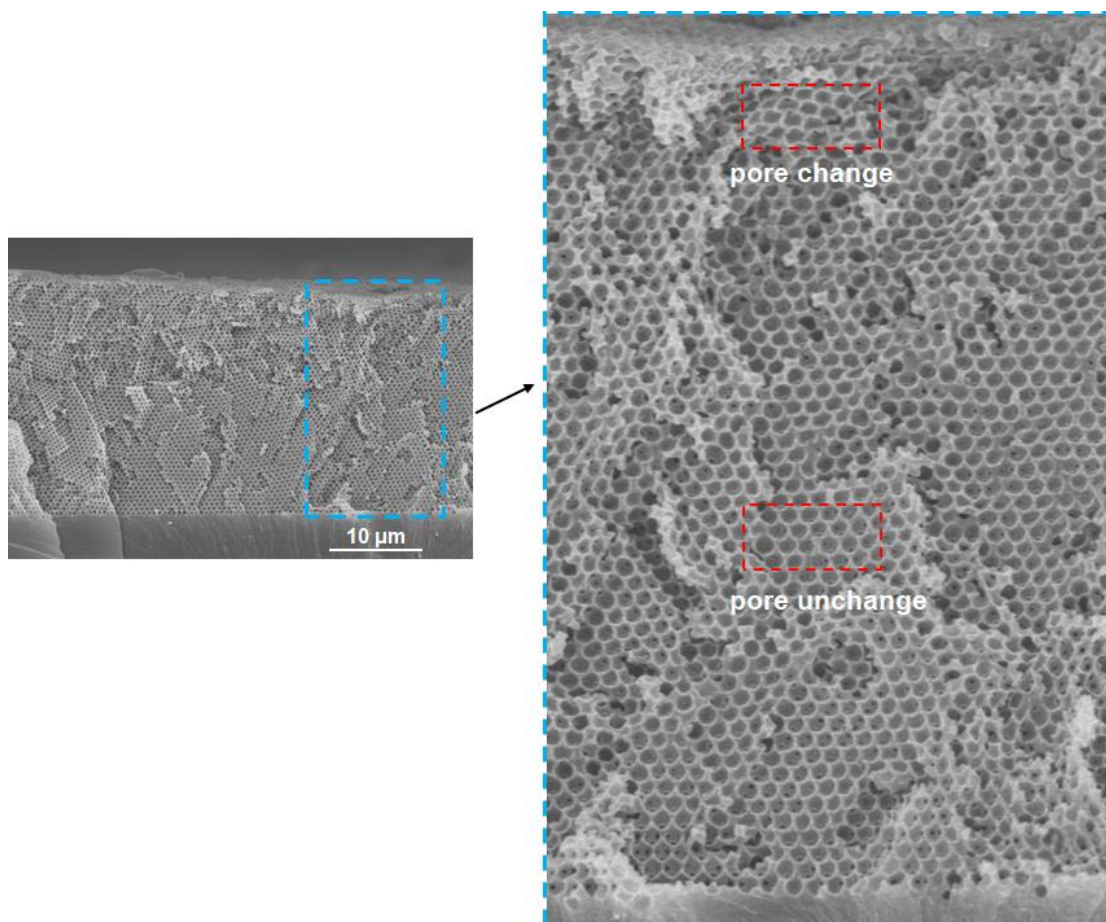

**Figure S13.** Side-view SEM images of the AZOIOs after UV irradiation (20 mW/cm<sup>2</sup>, 20 s).

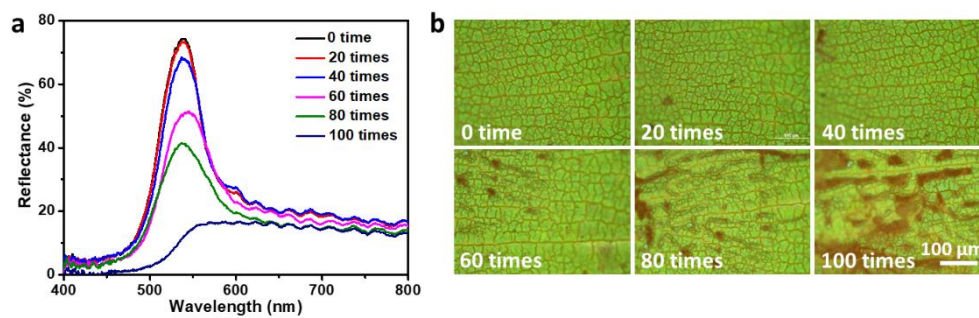

**Figure S14.** In-situ observation of (a) reflection spectra and (b) the corresponding optical images of AZOIOs after different abrasion times.
